# Supplementary material
Source: Springer Nature journal article supplement (https://www.springermedizin.de/resource/supplementary/12913_2014_3527_MOESM1_ESM.pdf/9533088)

—●— Non-surgical discharges

—●— Surgical discharges

### MEN

### WOMEN

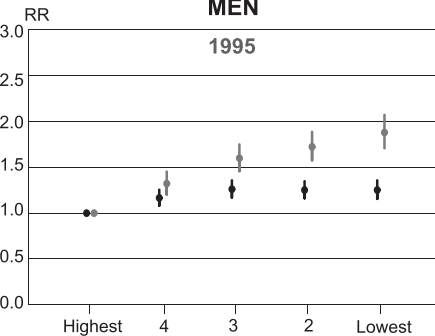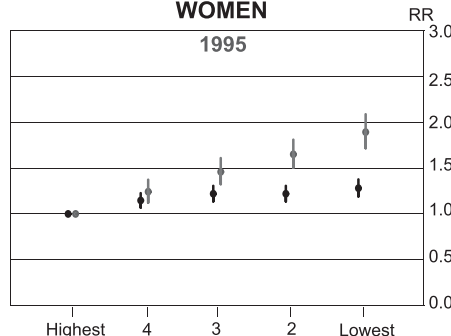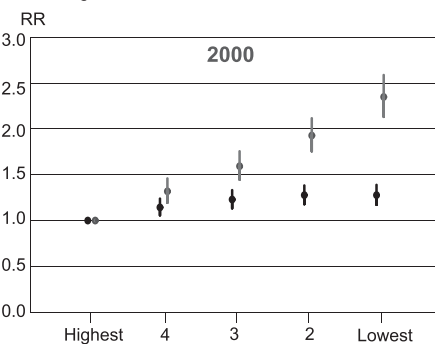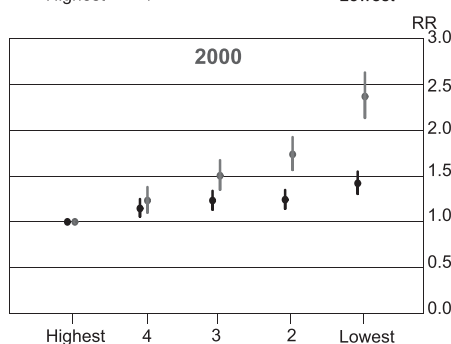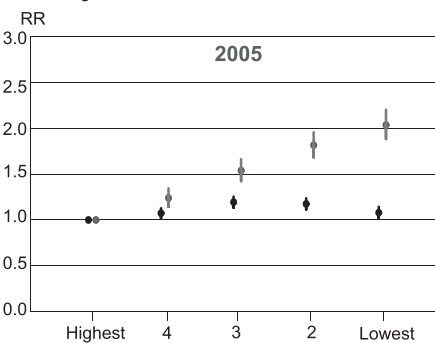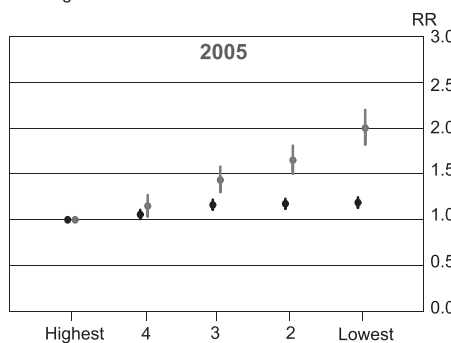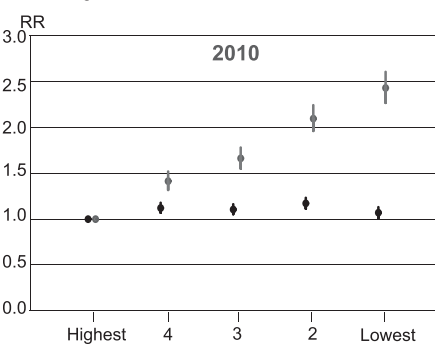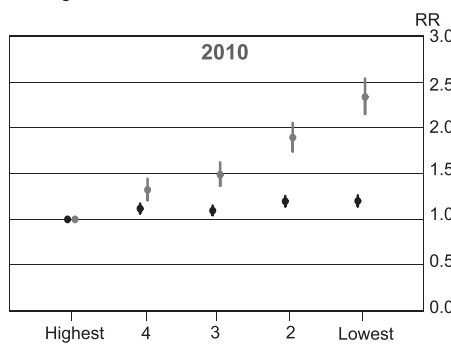

Supplement: MOESM1 [file 9533088]
